# Supplementary material for: Comprehensive analysis reveals TSEN54 as a robust prognosis biomarker and promising immune-related therapeutic target for hepatocellular carcinoma
Source: publisher site journal article supplement (doi:10.18632/aging.204645), 2023-04-08
Supplement: Supplementary file [file aging-v15i7-204645-supplementary-material-SD1.pdf]

## SUPPLEMENTARY FIGURES

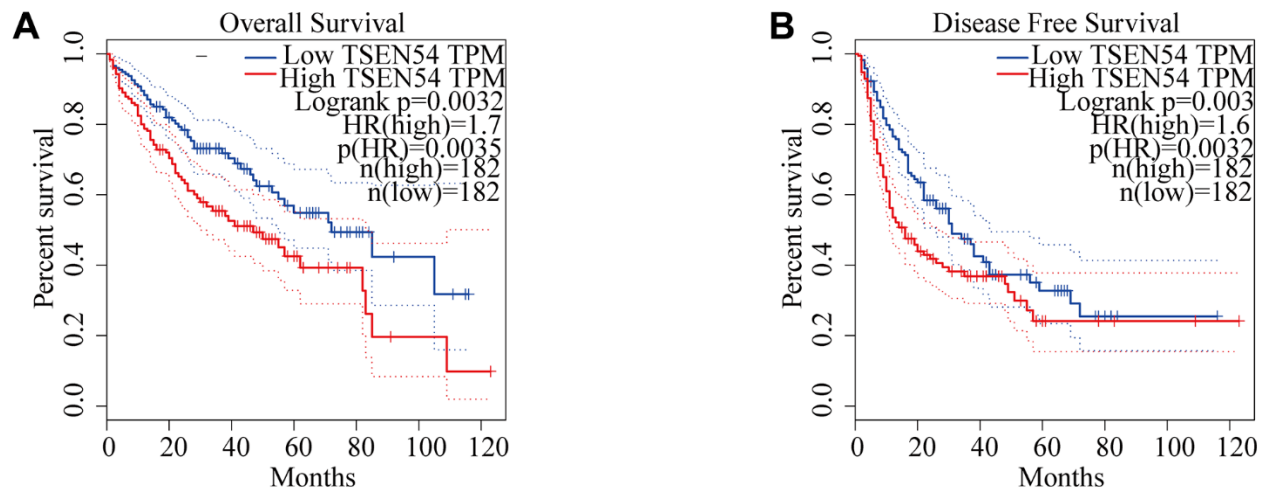

**Supplementary Figure 1.** Survival curves using the GEPIA website are shown for (A) OS and (B) DFS.

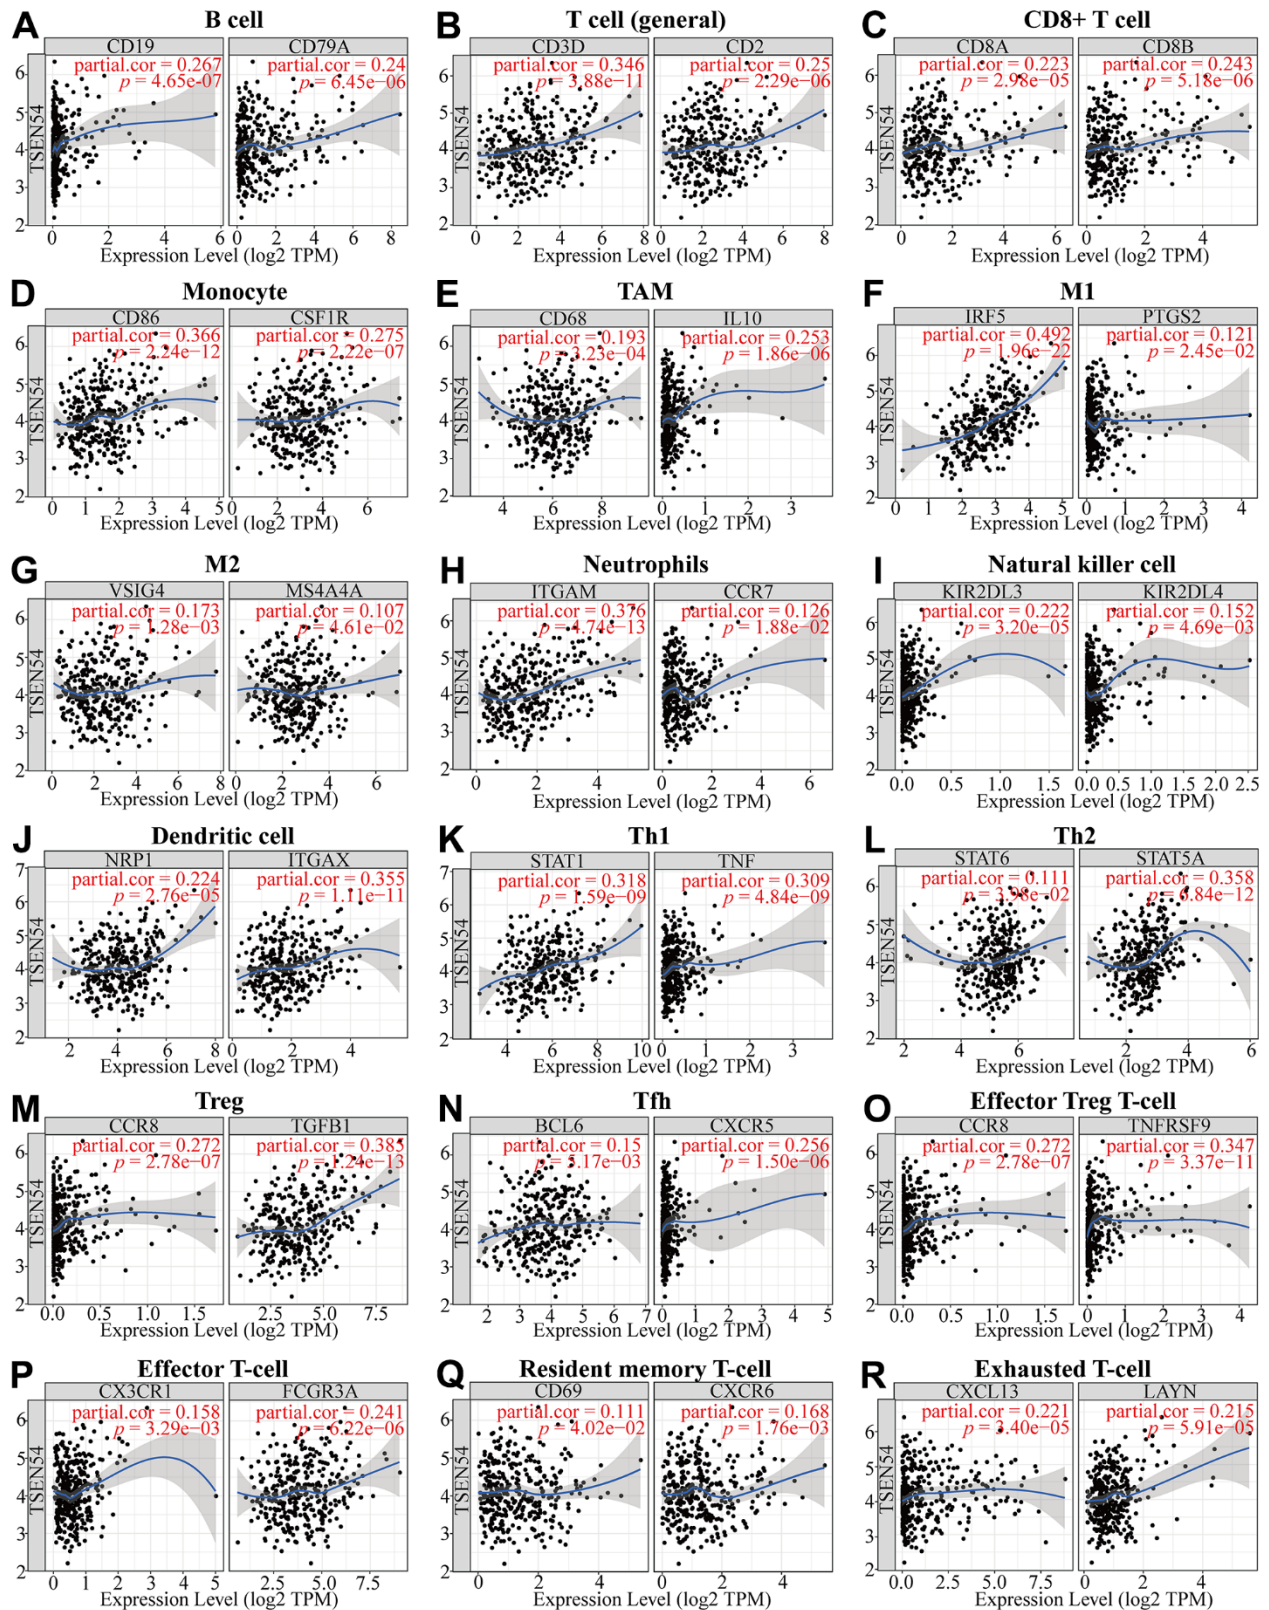

**Supplementary Figure 2. Correlations between TSEN54 expression and immune cell markers in HCC. (A) B cell; (B) T cell (general); (C) CD8+ T cell; (D) Monocyte; (E) TAM; (F) M1; (G) M2; (H) Neutrophils; (I) Natural killer cell; (J) Dendritic cell; (K) Th1; (L) Th2; (M) Treg; (N) Tfh; (O) Effector Treg T-cell; (P) Effector T-cell; (Q) Resident memory T-cell; (R) Exhausted T-cell.**

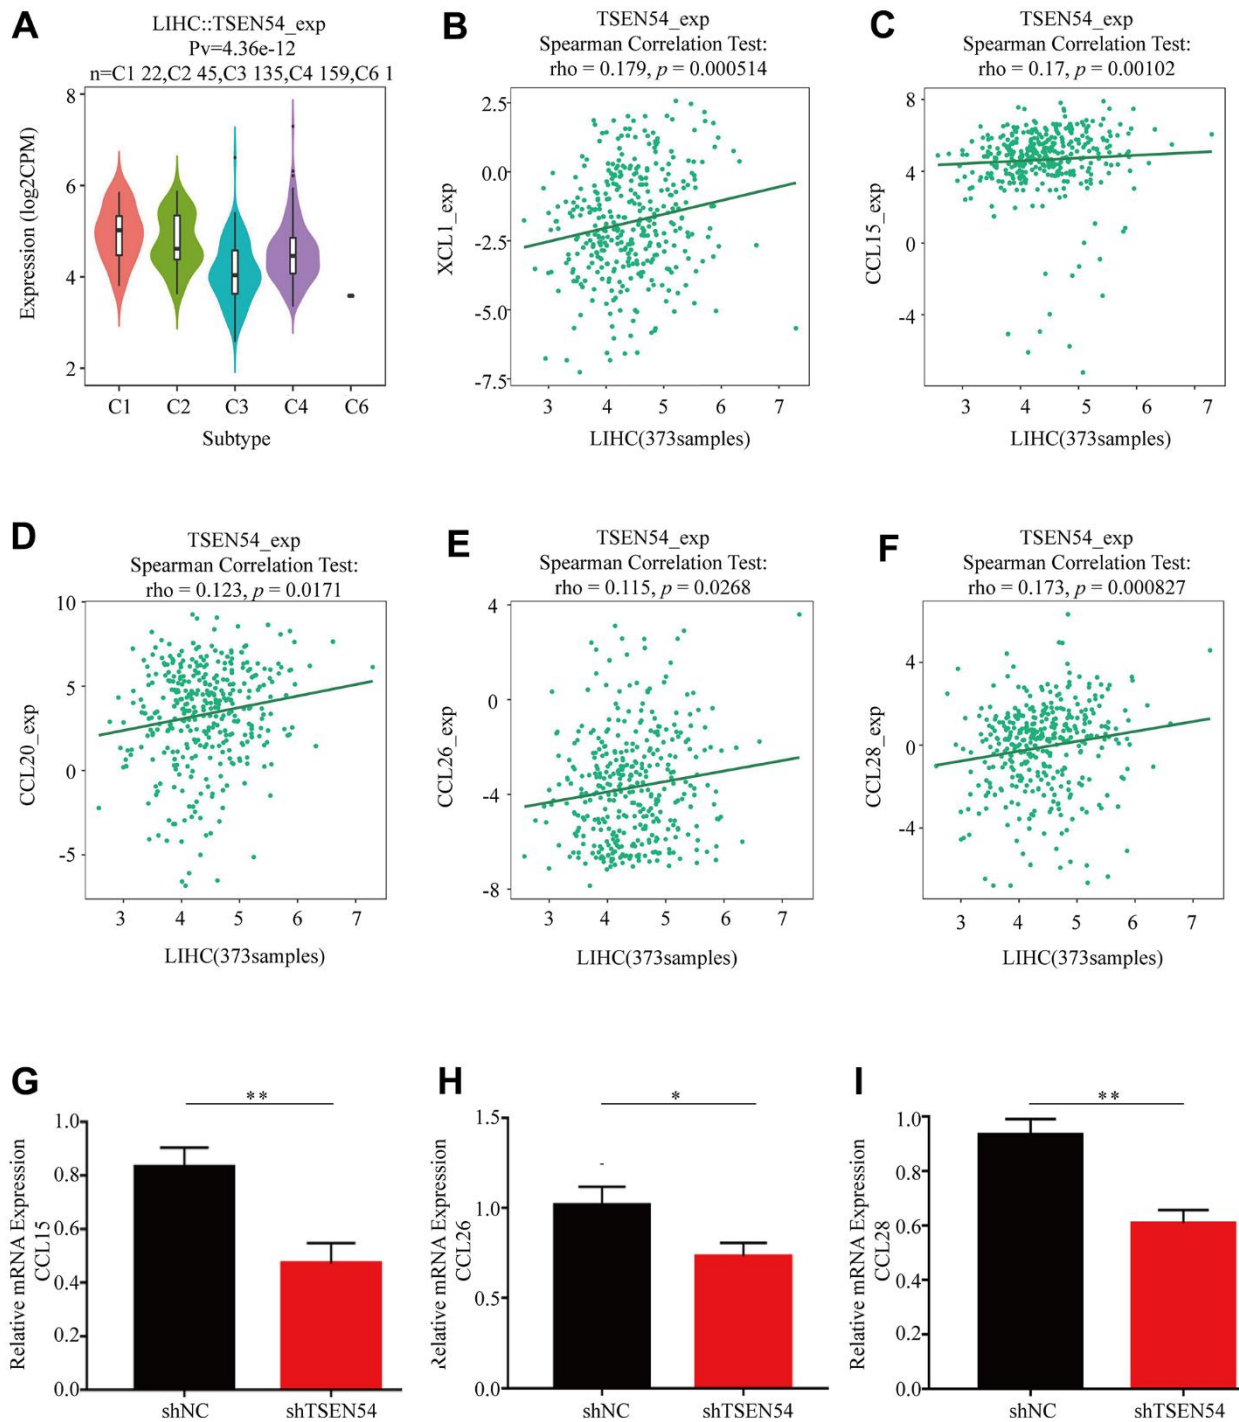

**Supplementary Figure 3. Association of TSEN54 expression with immune subtypes and chemokines expression in hepatocellular carcinoma.** (A) Expression of TSEN54 in different immune subtypes. Association between TSEN54 expression and expression of chemokine (B) XCL1; (C) CCL15; (D) CCL20; (E) CCL26; (F) CCL28. Expression levels of chemokines (G) CCL15; (H) CCL26; (I) CCL28 in HCCLM3 cells undergoing different treatments. \* $p < 0.05$ , \*\* $p < 0.01$ , \*\*\* $p < 0.001$ .

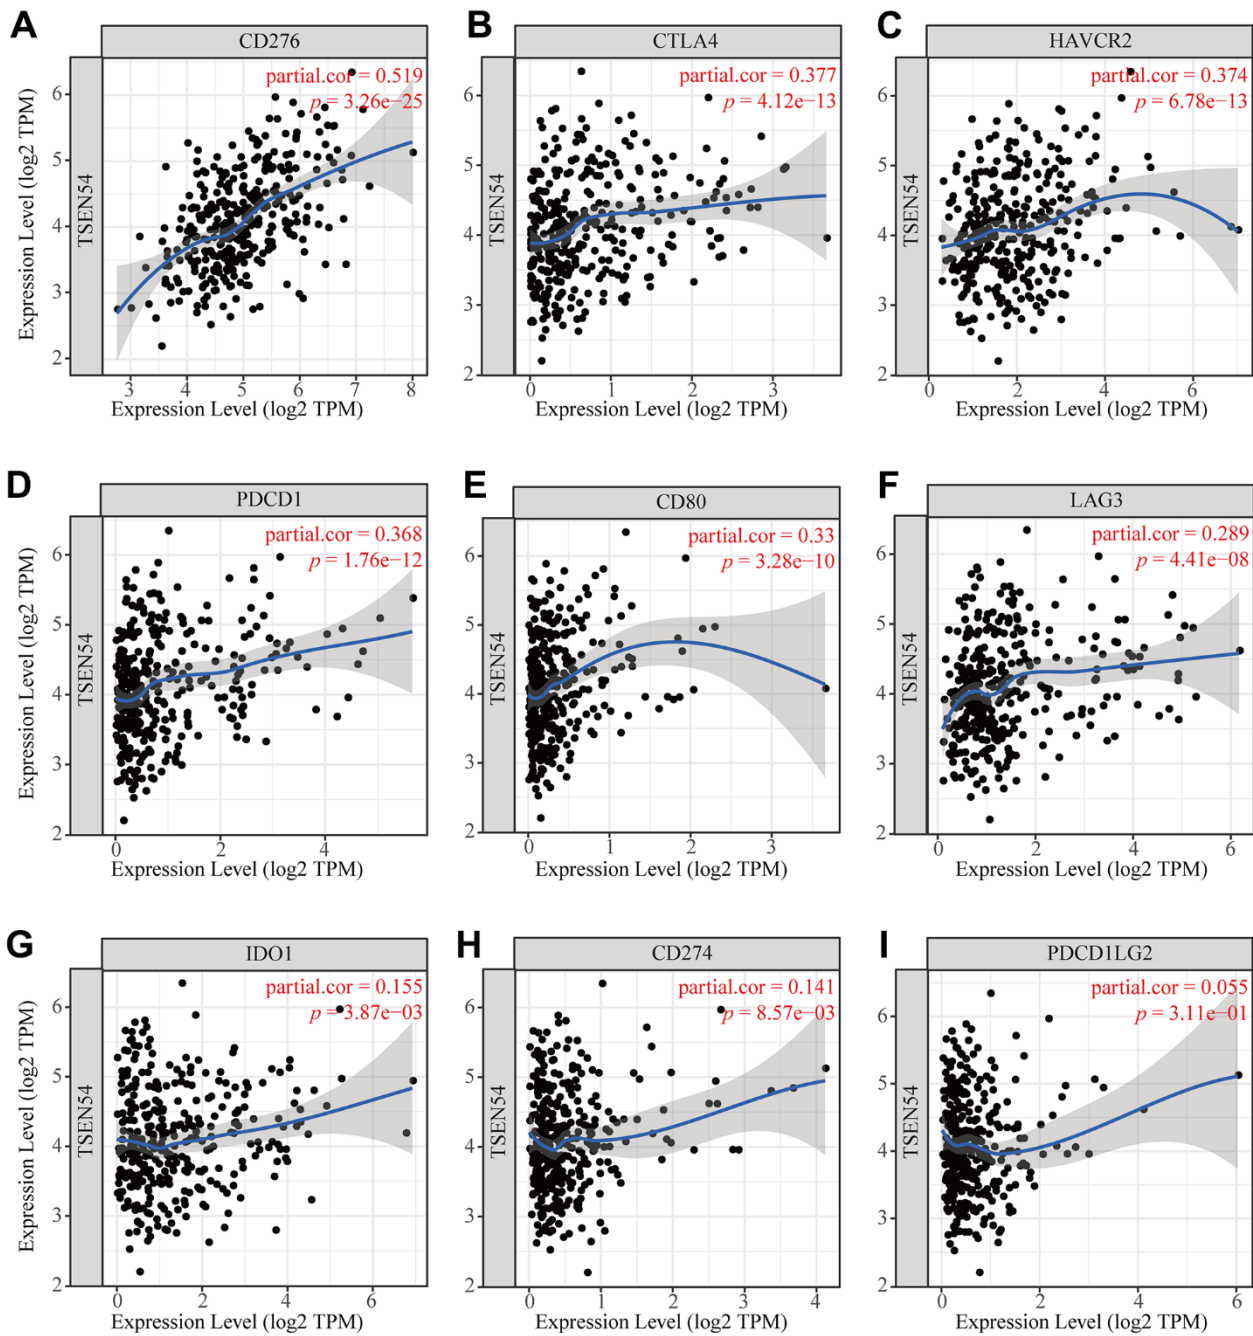

**Supplementary Figure 4. Correlation between the expression level of TSEN54 and immune checkpoints in HCC. (A) CD276; (B) CTLA4; (C) HAVCR2; (D) PDCD1; (E) CD80; (F) LAG3; (G) IDO1; (H) CD274; (I) PDCD1LG2.**
